# Supplementary material for: Novel functional roles of caspase-related genes in the regulation of apoptosis and autophagy
Source: PubMed Central journal article supplement — Korean J Physiol Pharmacol. 2016 Oct 28;20(6):573–80. doi: 10.4196/kjpp.2016.20.6.573 (PMC5106391; doi:10.4196/kjpp.2016.20.6.573), 2016-10-28
Supplement: kjpp-20-573-s001.pdf [file kjpp-20-573-s001.pdf]

MCF7

293A

(1) ALFY  
: autophagy  
+ apoptosis

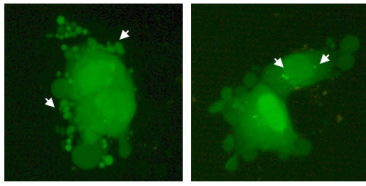

(12) TAK1  
: autophagy

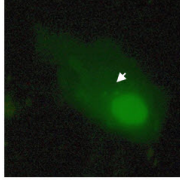

(13) EEF1A1  
: autophagy  
+ apoptosis

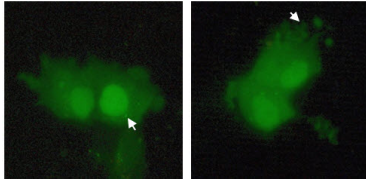

(1) ALFY  
: autophagy

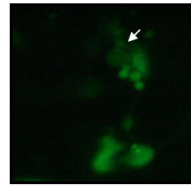

(12) TAK1  
: autophagy

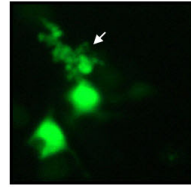

**Supplementary Fig. 1. Autophagic or apoptotic phenotypes induced by ALFY, TAK1 or EEF1A1.** GFP-LC3 was co-transfected with indicated plasmids. After transfection, the cells were incubated for 48 h, and cell death types were then detected using fluorescence microscopy. The punctuate structures of cytoplasm indicated autophagosomes. Apoptosis was detected as blebbing structures.
